# Supplementary material for: Comorbid Hypertension Reduces the Risk of Ventricular Arrhythmia in Chronic Heart Failure Patients with Implantable Cardioverter-Defibrillators
Source: MDPI journal article supplement (doi:10.3390/jcm11102816), 2022-05-17
Supplement: s1 [file s1]

Table S1: Baseline characteristics of patients at ICD implantation and balancing tests before and after inverse probability weighting and entropy balancing.

| Characteristics           | Hypertension        |               | Non-hypertension    |               |             | Standard mean difference |               |             |
|---------------------------|---------------------|---------------|---------------------|---------------|-------------|--------------------------|---------------|-------------|
|                           | Before<br>weighting | After<br>IPTW | Before<br>weighting | After<br>IPTW | After<br>EB | Before<br>weighting      | After<br>IPTW | After<br>EB |
| n                         | 424                 |               | 540                 |               |             |                          |               |             |
| Age                       | 63.1                | 60.9          | 55.6                | 61.2          | 63.1        | 0.606                    | 0.027         | <0.001      |
| Male (%)                  | 80.7                | 81.1          | 77.8                | 79.6          | 80.7        | 0.071                    | 0.038         | <0.001      |
| Body Mass Index           | 25.6                | 25.1          | 24.2                | 25.1          | 25.6        | 0.400                    | 0.014         | <0.001      |
| Heart rate                | 68.5                | 68.8          | 67.0                | 68.7          | 68.5        | 0.037                    | 0.010         | <0.001      |
| Systolic blood pressure   | 125.5               | 120.6         | 115.1               | 120.6         | 125.5       | 0.681                    | 0.002         | <0.001      |
| Diastolic blood pressure  | 75.6                | 73.8          | 71.3                | 73.7          | 75.6        | 0.423                    | 0.009         | <0.001      |
| Smoking                   | 47.9                | 48.4          | 44.3                | 47.1          | 47.9        | 0.073                    | 0.026         | <0.001      |
| Alcohol use               | 38.9                | 37.6          | 34.3                | 36.6          | 38.9        | 0.097                    | 0.022         | <0.001      |
| SCD family history        | 5.0                 | 4.5           | 4.8                 | 4.5           | 5.0         | 0.006                    | <0.001        | <0.001      |
| Ablation history          | 7.1                 | 6.3           | 9.8                 | 6.9           | 7.1         | 0.099                    | 0.025         | <0.001      |
| NYHA class                |                     |               |                     |               |             | 0.059                    | 0.013         | <0.001      |
| I/II                      | 62.5                | 59.5          | 59.1                | 60.1          | 62.5        |                          |               |             |
| III/IV                    | 37.5                | 40.5          | 40.4                | 39.9          | 37.5        |                          |               |             |
| ICD primary prevention    | 33.7                | 37.0          | 33.0                | 36.0          | 33.7        | 0.016                    | 0.020         | <0.001      |
| Syncope                   | 40.1                | 42.1          | 47.5                | 41.2          | 40.1        | 0.129                    | 0.018         | <0.001      |
| Frequent PVCs             | 45.3                | 43.9          | 43.1                | 45.2          | 45.3        | 0.043                    | 0.025         | <0.001      |
| Atrial fibrillation       | 30.7                | 31.5          | 29.1                | 30.1          | 30.7        | 0.035                    | 0.030         | <0.001      |
| Atrioventricular block    | 12.5                | 12.7          | 12.6                | 13.0          | 12.5        | 0.003                    | 0.009         | <0.001      |
| Coronary arterial disease | 61.8                | 53.1          | 36.3                | 53.3          | 61.8        | 0.527                    | 0.006         | <0.001      |
| Stroke                    | 9.0                 | 7.1           | 4.4                 | 6.7           | 9.0         | 0.181                    | 0.015         | <0.001      |
| Pulmonary hypertension    | 8.5                 | 9.3           | 8.5                 | 8.8           | 8.5         | 0.001                    | 0.017         | <0.001      |

|                                         |        |        |        |        |        |       |       |        |
|-----------------------------------------|--------|--------|--------|--------|--------|-------|-------|--------|
| Diabetes mellitus                       | 28.5   | 22.1   | 13.3   | 21.5   | 28.5   | 0.380 | 0.016 | <0.001 |
| Hyperlipidemia                          | 68.2   | 57.0   | 35.2   | 57.1   | 68.2   | 0.699 | 0.004 | <0.001 |
| Hyperuricemia                           | 13.0   | 10.3   | 8.3    | 10.7   | 13.0   | 0.151 | 0.012 | <0.001 |
| eGFR<60 ml/min/1.73m <sup>2</sup>       | 32.8   | 25.7   | 16.7   | 25.3   | 32.8   | 0.380 | 0.008 | <0.001 |
| Antiarrhythmic drugs                    | 58.3   | 58.0   | 61.7   | 57.4   | 58.3   | 0.070 | 0.012 | <0.001 |
| RAAS inhibitors                         | 77.6   | 72.8   | 65.6   | 72.2   | 77.6   | 0.269 | 0.013 | <0.001 |
| β-blockers                              | 91.3   | 92.1   | 90.4   | 92.2   | 91.3   | 0.031 | 0.003 | <0.001 |
| Calcium channel blockers                | 17.9   | 7.0    | 3.7    | 7.0    | 17.9   | 0.470 | 0.001 | <0.001 |
| Loop diuretics                          | 70.5   | 75.8   | 73.5   | 74.3   | 70.5   | 0.067 | 0.035 | <0.001 |
| Digoxin                                 | 25.2   | 25.3   | 23.9   | 24.4   | 25.2   | 0.031 | 0.020 | <0.001 |
| Mineralcorticoid<br>receptor antagonist | 60.1   | 68.3   | 70.0   | 68.2   | 60.1   | 0.208 | 0.002 | <0.001 |
| Antiplatelets                           | 43.9   | 38.9   | 28.1   | 39.5   | 43.9   | 0.332 | 0.013 | <0.001 |
| Anticoagulants                          | 21.9   | 20.5   | 19.1   | 19.9   | 21.9   | 0.071 | 0.015 | <0.001 |
| Statin                                  | 64.2   | 57.2   | 42.8   | 57.1   | 64.2   | 0.439 | 0.002 | <0.001 |
| Left ventricular<br>ejection fraction   | 42.8   | 41.3   | 40.9   | 41.5   | 42.8   | 0.145 | 0.020 | <0.001 |
| Left atrial diameter                    | 44.2   | 44.0   | 43.1   | 43.6   | 44.2   | 0.143 | 0.046 | <0.001 |
| Left ventricular mass index             | 150.2  | 151.5  | 151.0  | 150.1  | 150.2  | 0.016 | 0.025 | <0.001 |
| Right ventricular diameter              | 23.18  | 23.1   | 23.5   | 23.0   | 23.18  | 0.058 | 0.021 | <0.001 |
| NT-proBNP                               | 1707.9 | 1586.0 | 1475.6 | 1569.2 | 1707.9 | 0.105 | 0.008 | <0.001 |
| Hemoglobin                              | 141.3  | 141.5  | 142.2  | 141.1  | 141.3  | 0.047 | 0.023 | <0.001 |
| LDH                                     | 206.1  | 205.4  | 205.3  | 204.6  | 206.1  | 0.011 | 0.010 | <0.001 |
| ESR                                     | 11.6   | 11.7   | 10.9   | 11.8   | 11.6   | 0.056 | 0.012 | <0.001 |
| TC                                      | 3.90   | 3.98   | 4.07   | 3.97   | 3.90   | 0.156 | 0.016 | <0.001 |
| HDL                                     | 1.09   | 1.12   | 1.14   | 1.12   | 1.09   | 0.104 | 0.011 | <0.001 |

|     |      |      |      |      |      |       |       |        |
|-----|------|------|------|------|------|-------|-------|--------|
| LDL | 2.31 | 2.37 | 2.43 | 2.35 | 2.31 | 0.143 | 0.028 | <0.001 |
|-----|------|------|------|------|------|-------|-------|--------|

RAAS inhibitors, Renin-angiotensin-aldosterone System inhibitors; other abbreviations as in Table 1.

Table S2. Associations between Hypertension diagnosis and the primary endpoint of VA using competing risk model in the crude analysis, multivariable analysis, propensity-score analysis and entropy-balanced analysis.

| Analysis                             | VA events in competing risk model<br>HR (95% CI) | p value |
|--------------------------------------|--------------------------------------------------|---------|
| Crude analyses                       | 0.67 (0.54-0.82)                                 | <0.001  |
| Multivariable analyses*              | 0.79 (0.63-0.98)                                 | 0.032   |
| Propensity-score analyses            |                                                  |         |
| With inverse probability weighting†  | 0.75 (0.57-0.97)                                 | 0.029   |
| With matching‡                       | 0.72 (0.54-0.95)                                 | 0.027   |
| Adjusted for propensity score§       | 0.76 (0.60-0.97)                                 | 0.028   |
| Entropy-balanced weighting analyses* | 0.71 (0.51-1.00)                                 | 0.048   |

\* Shown is the hazard ratio from the multivariable Fine-Gray sub-distribution hazard model, with additional adjustment for all demographic characteristics, comorbidities, echocardiographic parameters, medication, and laboratory parameters. Hypertension, together with age, sex, ICD prevention indication, coronary atrial disease, pulmonary hypertension, right ventricular diameter, and calcium channel blockers remained in the final model. The analysis included all 964 patients.

† Shown is the primary analysis with a hazard ratio from the multivariate Fine-Gray sub-distribution hazard model model adjusted with the same covariates with inverse probability weighting according to the propensity score. The analysis included all the patients.

‡ Shown is the hazard ratio from a multivariable Fine-Gray sub-distribution hazard model with the same covariates with matching according to the propensity score. The analysis included 482 patients (241 with hypertension and 241 without).

§ Shown is the hazard ratio from a multivariable Fine-Gray sub-distribution hazard model with additional adjustment for the propensity score. The analysis included all the patients.

\*Shown is the hazard ratio from a multivariable Fine-Gray sub-distribution hazard model using weights from entropy balancing. The analysis included all the patients.

Figure S1. Love plot displaying absolute standardized differences comparing 46 baseline characteristics between chronic heart failure patients with or without comorbid hypertension before and after inverse probability weighting and entropy balancing.

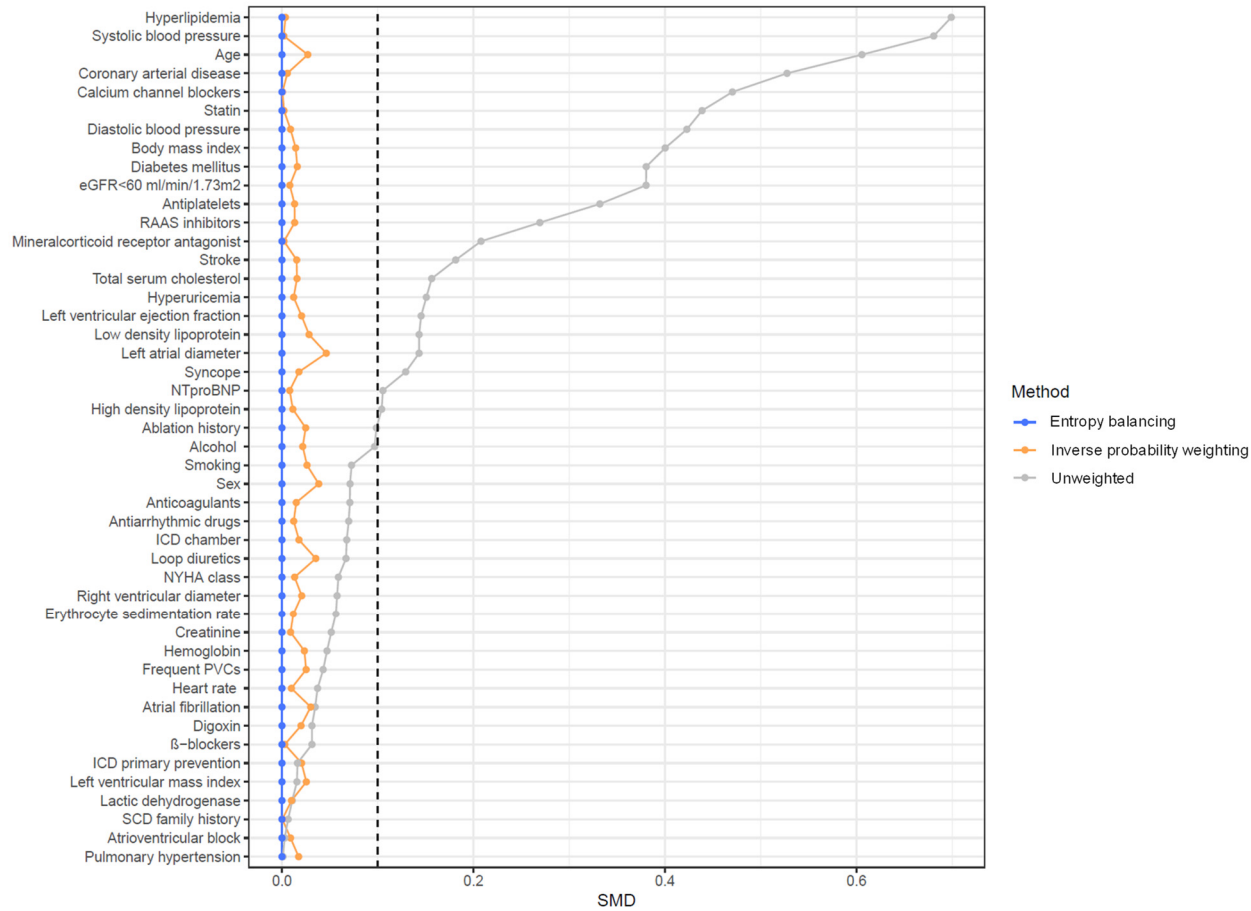

Figure S2. Entropy balancing weighted Kaplan–Meier time-to-event curves for the cumulative incidence of primary outcome events for patients with different (A) grades and (B) controlled status of hypertension.

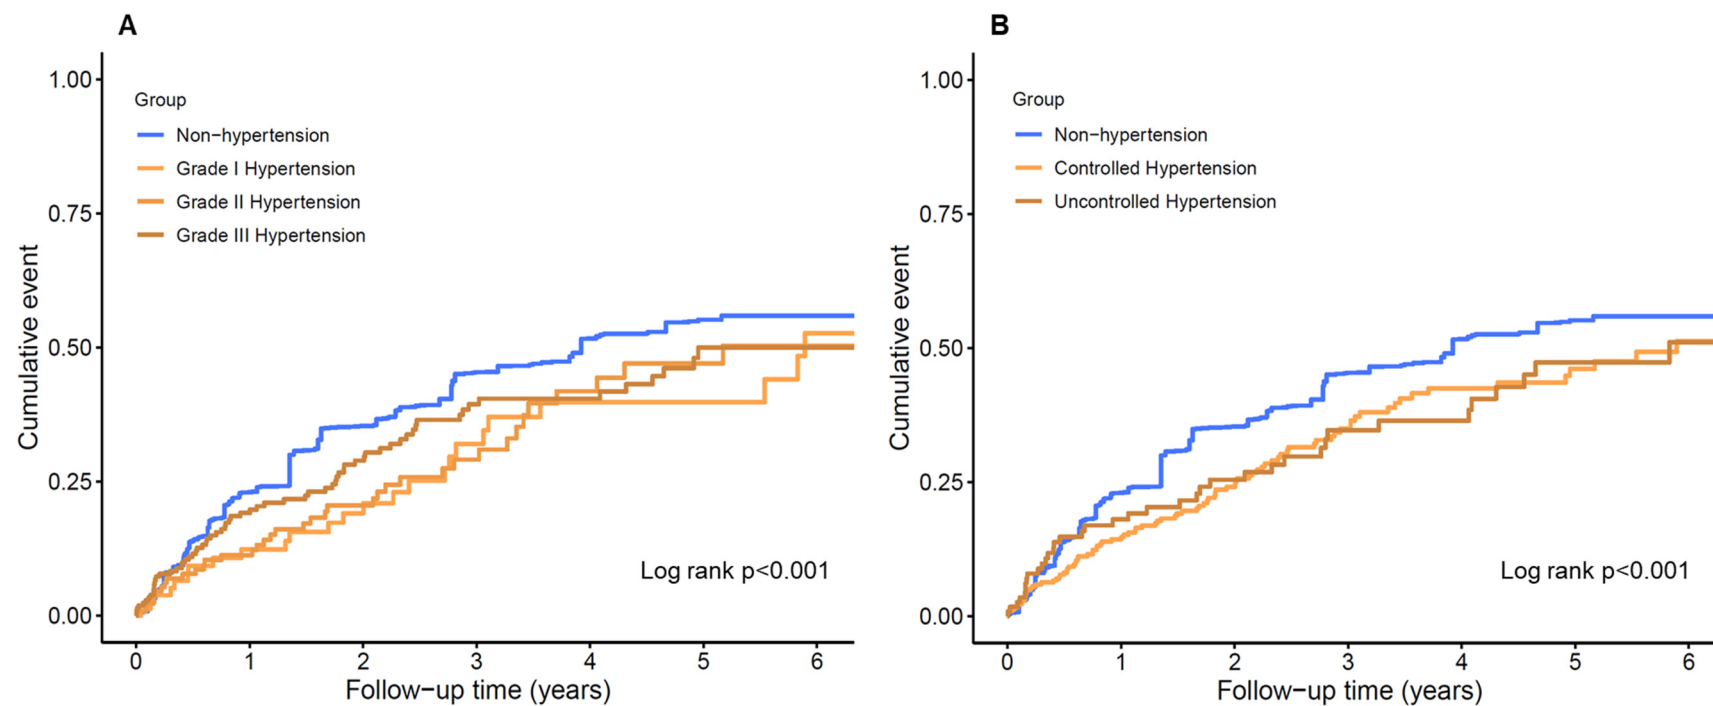

Figure S3. Restricted Cubic Spline Plots for Primary Outcome by Diastolic Blood Pressure.

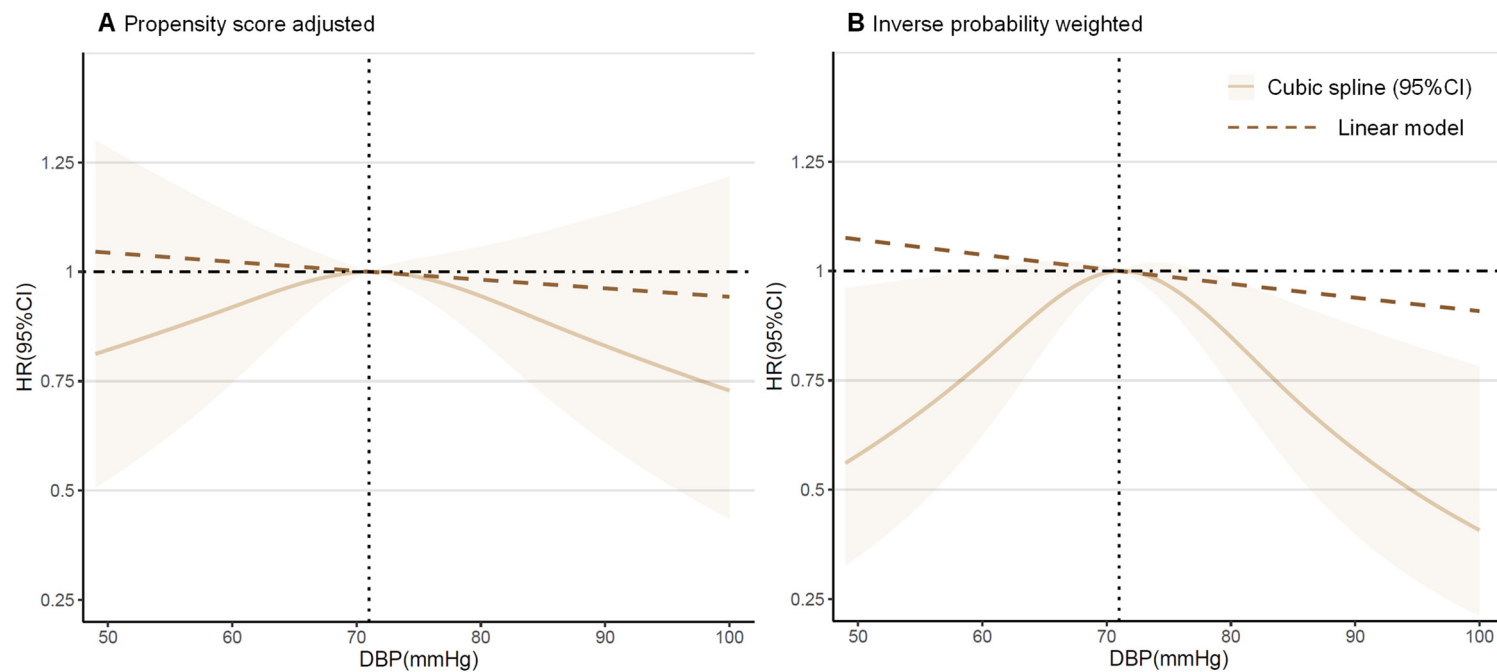

Hazard ratios and 95% confidence intervals for primary VA outcome by diastolic blood pressure level in 964 patients with chronic heart failure according to restricted cubic spline regression models using 3 knots. Solid black lines indicate hazard ratios, and shaded areas indicate 95% CI. Plots on the left panel (A) are adjusted for propensity scores, and those on the right panel (B) are inverse probability weighted on 46 baseline characteristics.
